# Supplementary material
Source: PubMed Central journal article supplement (PMC8238449)
Supplement: mmc1.pdf [file mmc1.pdf]

# THE LANCET

## Infectious Diseases

### Supplementary appendix

This appendix formed part of the original submission and has been peer reviewed. We post it as supplied by the authors.

Supplement to: Han B, Song Y, Li C, et al. Safety, tolerability and immunogenicity of an inactivated SARS-CoV-2 vaccine (CoronaVac) in healthy children and adolescents: a double-blind, randomised, controlled, phase 1/2 clinical trial. *Lancet Infect Dis* 2021; published online June 28. [https://doi.org/10.1016/S1473-3099\(21\)00319-4](https://doi.org/10.1016/S1473-3099(21)00319-4).

## **Appendix 1 Immunogenic Detection Method**

### **Detection Method of Neutralization Potency against Live SARS-CoV-2**

Micro cytopathic effect assay was adopted.

**Serum treatment:** all serum samples were inactivated at 56°C in a water bath for 30 minutes.

Medium addition: the cell maintenance medium was added to the cell control group at 100µl/well, and 50 µl/well of maintenance medium was supplemented to the to-be-tested serum group, virus back titration group and positive control group from the second dilution.

**Dilution of the serum sample:** The serum was diluted four-fold (60 µl sample + 180 µl maintenance medium) with cell maintenance medium (2% newborn calf serum-199 (2% sodium hydrogen carbonate) cell maintenance medium). The diluted serum was added to the cell plate at 100 µl/well, and each sample was diluted to 2 wells in parallel. 50 µl of the mixture in the first dilution was pipetted into the next dilution, and the mixture was pipetted up and down for 8-10 times. The mixture was diluted to the appropriate dilution range by this method, and 50 µl of the last dilution was discarded, and 50 µl of the diluted sample was retained in each well.

**Dilution of the virus for neutralization:** the SAR-CoV-2 used for neutralization was diluted to 100CCID<sub>50</sub>/0.05ml by titer.

**Neutralization:** Serum of different dilutions was mixed with 100CCID<sub>50</sub>/0.05ml virus liquid in equal volume (50µl+50µl), respectively, and then incubated in an incubator at 36.5°C, 5%CO<sub>2</sub> for 2h.

**Experimental control:** Negative serum control, positive serum control, serum sample and cell control were set simultaneously.

**Virus Back Titration:** The virus suspension diluted to 100 CCID<sub>50</sub>/0.05 mL was diluted via ten-fold serial dilution, i.e. diluted to 10 CCID<sub>50</sub>/0.05 ml, 1 CCID<sub>50</sub>/0.05 mL and 0.1 CCID<sub>50</sub>/0.05 ml, and added to the 96-well cell plate respectively, 12 well per dilution and 50 µl per well, then 50 µl of cell maintenance medium was added to each well, and the plate was incubated in an incubator at 36.5°C, 5% CO<sub>2</sub> for 5 days.

**Cell Inoculation and Culture:** After incubation, 100µL of Vero cell suspension (cell concentration: 1.0-2.0×10<sup>5</sup> cell/ml) was added to each well, and then incubated in an incubator at 36.5°C, 5% CO<sub>2</sub> for 5 days.

**Interpretation of the Results:** It was observed for the cytopathic effect after cultured for 3-5 days, and the neutralizing antibody titer of the to-be-tested serum sample was determined according to the observation results of the cytopathic effect (CPE) on the 5<sup>th</sup> day. The reciprocal of the highest serum dilution without cytopathic effects the end titer. When 1 of the 2 wells of the highest dilution serum shows CPE, while the other does not, the reciprocal of the dilution should be the neutralizing antibody titer of the serum specimen; the reciprocal of the mean dilution of the two wells should be the neutralizing antibody titer of the serum specimen when the 2 wells with the highest dilution are completely pathological while the adjacent 2 wells with low dilution are not pathological completely; when 1 of two adjacent wells is pathological while the other not, the reciprocal of the average dilutions of 2 wells should be the neutralizing antibody titer of the serum specimen. For example, 2 wells with high dilution of 1:16 have a complete CPE, while the adjacent 2 wells with low dilution of 1:8 have no CPE; or in 2 adjacent wells with dilutions of 1:8 and 1:16, one has a CPE, while the other does not. In this case, the reciprocal 12 of the average dilutions of 2 wells is the neutralizing antibody titer of the serum

## Appendix 2 Safety results

**Table 2-1: Adverse reactions reported within 28 days after the first and the second dose of vaccine or alum only in phase 1 and phase 2**

|                                                    | 1.5µg group<br>(n=219) |         | 3µg group<br>(n=217) |         | Alum only group<br>(n=114) |         | Total<br>(n=550) |          | P value |
|----------------------------------------------------|------------------------|---------|----------------------|---------|----------------------------|---------|------------------|----------|---------|
|                                                    | No. of events          | n (%)   | No. of events        | n (%)   | No. of events              | n (%)   | No. of events    | n (%)    |         |
| <b>Solicited adverse reactions within 0-7 days</b> |                        |         |                      |         |                            |         |                  |          |         |
| <b>Any</b>                                         | 103                    | 51(23%) | 92                   | 59(27%) | 29                         | 22(19%) | 224              | 132(24%) | 0.276   |
| Grade 1                                            | 75                     | 39(18%) | 71                   | 51(24%) | 20                         | 15(13%) | 166              | 105(19%) | 0.065   |
| Grade 2                                            | 26                     | 16(7%)  | 21                   | 19(9%)  | 9                          | 9(8%)   | 56               | 44(8%)   | 0.824   |
| Grade 3                                            | 2                      | 2(1%)   | 0                    | 0(0%)   | 0                          | 0(0%)   | 2                | 2(<1%)   | 0.356   |
| <b>Injection site adverse reactions</b>            |                        |         |                      |         |                            |         |                  |          |         |
| Pain                                               | 44                     | 36(16%) | 41                   | 35(16%) | 2                          | 2(2%)   | 87               | 73(13%)  | <0.0001 |
| Grade 1                                            | 41                     | 34(16%) | 41                   | 35(16%) | 2                          | 2(2%)   | 84               | 71(13%)  | <0.0001 |
| Grade 2                                            | 3                      | 2(1%)   | 0                    | 0(0%)   | 0                          | 0(0%)   | 3                | 2(<1%)   | 0.356   |
| Swelling                                           | 3                      | 3(1%)   | 7                    | 6(3%)   | 1                          | 1(1%)   | 11               | 10(2%)   | 0.496   |
| Grade 1                                            | 0                      | 0(0%)   | 4                    | 4(2%)   | 0                          | 0(0%)   | 4                | 4(1%)    | 0.053   |
| Grade 2                                            | 3                      | 3(1%)   | 3                    | 3(1%)   | 1                          | 1(1%)   | 7                | 7(1%)    | 1.000   |
| Induration                                         | 0                      | 0(0%)   | 2                    | 2(1%)   | 0                          | 0(0%)   | 2                | 2(<1%)   | 0.198   |
| Grade 1                                            | 0                      | 0(0%)   | 2                    | 2(1%)   | 0                          | 0(0%)   | 2                | 2(<1%)   | 0.198   |
| Erythema                                           | 0                      | 0(0%)   | 1                    | 1(<1%)  | 0                          | 0(0%)   | 1                | 1(<1%)   | 0.602   |
| Grade 1                                            | 0                      | 0(0%)   | 1                    | 1(<1%)  | 0                          | 0(0%)   | 1                | 1(<1%)   | 0.602   |
| Pruritus                                           | 4                      | 3(1%)   | 2                    | 2(1%)   | 0                          | 0(0%)   | 6                | 5(1%)    | 0.640   |
| Grade 1                                            | 4                      | 3(1%)   | 2                    | 2(1%)   | 0                          | 0(0%)   | 6                | 5(1%)    | 0.640   |
| <b>Systematic adverse reactions</b>                |                        |         |                      |         |                            |         |                  |          |         |
| Fever                                              | 9                      | 9(4%)   | 13                   | 11(5%)  | 5                          | 5(4%)   | 27               | 25(5%)   | 0.931   |
| Grade 1                                            | 3                      | 3(1%)   | 2                    | 2(1%)   | 2                          | 2(2%)   | 7                | 7(1%)    | 0.886   |
| Grade 2                                            | 4                      | 4(2%)   | 11                   | 10(5%)  | 3                          | 3(3%)   | 18               | 17(3%)   | 0.225   |
| Grade 3                                            | 2                      | 2(1%)   | 0                    | 0(0%)   | 0                          | 0(0%)   | 2                | 2(<1%)   | 0.356   |
| Cough                                              | 8                      | 5(2%)   | 8                    | 8(4%)   | 5                          | 5(4%)   | 21               | 18(3%)   | 0.474   |
| Grade 1                                            | 4                      | 1(<1%)  | 4                    | 4(2%)   | 3                          | 3(3%)   | 11               | 8(1%)    | 0.188   |
| Grade 2                                            | 4                      | 4(2%)   | 4                    | 4(2%)   | 2                          | 2(2%)   | 10               | 10(2%)   | 1.000   |
| Headache                                           | 9                      | 6(3%)   | 5                    | 4(2%)   | 3                          | 3(3%)   | 17               | 13(2%)   | 0.818   |
| Grade 1                                            | 5                      | 3(1%)   | 4                    | 3(1%)   | 1                          | 1(1%)   | 10               | 7(1%)    | 1.000   |
| Grade 2                                            | 4                      | 4(2%)   | 1                    | 1(<1%)  | 2                          | 2(2%)   | 7                | 7(1%)    | 0.385   |
| Anorexia                                           | 5                      | 3(1%)   | 4                    | 4(2%)   | 2                          | 2(2%)   | 11               | 9(2%)    | 0.915   |
| Grade 1                                            | 2                      | 1(<1%)  | 3                    | 3(1%)   | 2                          | 2(2%)   | 7                | 6(1%)    | 0.516   |
| Grade 2                                            | 3                      | 3(1%)   | 1                    | 1(<1%)  | 0                          | 0(0%)   | 4                | 4(1%)    | 0.540   |
| Diarrhoea                                          | 2                      | 2(1%)   | 2                    | 2(1%)   | 5                          | 4(4%)   | 9                | 8(1%)    | 0.164   |
| Grade 1                                            | 2                      | 2(1%)   | 2                    | 2(1%)   | 5                          | 4(4%)   | 9                | 8(1%)    | 0.164   |
| Nausea                                             | 5                      | 3(1%)   | 3                    | 2(1%)   | 2                          | 2(2%)   | 10               | 7(1%)    | 0.886   |
| Grade 1                                            | 5                      | 3(1%)   | 3                    | 2(1%)   | 2                          | 2(2%)   | 10               | 7(1%)    | 0.886   |
| Mucocutaneous eruption                             | 2                      | 2(1%)   | 2                    | 2(1%)   | 1                          | 1(1%)   | 5                | 5(1%)    | 1.000   |
| Grade 1                                            | 1                      | 1(<1%)  | 1                    | 1(<1%)  | 0                          | 0(0%)   | 2                | 2(<1%)   | 1.000   |
| Grade 2                                            | 1                      | 1(<1%)  | 1                    | 1(<1%)  | 1                          | 1(1%)   | 3                | 3(1%)    | 1.000   |
| Vomiting                                           | 3                      | 3(1%)   | 1                    | 1(<1%)  | 1                          | 1(1%)   | 5                | 5(1%)    | 0.845   |

|                                                       | 1.5µg group<br>(n=219) |         | 3µg group<br>(n=217) |         | Alum only group<br>(n=114) |         | Total<br>(n=550) |          | P value |
|-------------------------------------------------------|------------------------|---------|----------------------|---------|----------------------------|---------|------------------|----------|---------|
|                                                       | No. of events          | n (%)   | No. of events        | n (%)   | No. of events              | n (%)   | No. of events    | n (%)    |         |
| Grade 1                                               | 3                      | 3(1%)   | 1                    | 1(0%)   | 1                          | 1(1%)   | 5                | 5(1%)    | 0.845   |
| Muscle pain                                           | 5                      | 4(2%)   | 0                    | 0(0%)   | 0                          | 0(0%)   | 5                | 4(1%)    | 0.078   |
| Grade 1                                               | 2                      | 2(1%)   | 0                    | 0(0%)   | 0                          | 0(0%)   | 2                | 2(<1%)   | 0.356   |
| Grade 2                                               | 3                      | 2(1%)   | 0                    | 0(0%)   | 0                          | 0(0%)   | 3                | 2(<1%)   | 0.356   |
| Fatigue                                               | 4                      | 1(<1%)  | 1                    | 1(<1%)  | 1                          | 1(1%)   | 6                | 3(1%)    | 1.000   |
| Grade 1                                               | 3                      | 1(<1%)  | 1                    | 1(<1%)  | 1                          | 1(1%)   | 5                | 3(1%)    | 1.000   |
| Grade 2                                               | 1                      | 1(<1%)  | 0                    | 0(0%)   | 0                          | 0(0%)   | 1                | 1(<1%)   | 1.000   |
| Hypersensitivity                                      | 0                      | 0(0%)   | 0                    | 0(0%)   | 0                          | 1(1%)   | 1                | 1(<1%)   | 0.207   |
| Grade 1                                               | 0                      | 0(0%)   | 0                    | 0(0%)   | 1                          | 1(1%)   | 1                | 1(<1%)   | 0.207   |
| <b>Unsolicited adverse reactions within 0-28 days</b> |                        |         |                      |         |                            |         |                  |          |         |
| <b>Any</b>                                            | 15                     | 11(5%)  | 19                   | 15(7%)  | 10                         | 9(8%)   | 44               | 35(6%)   | 0.515   |
| Grade 1                                               | 3                      | 2(1%)   | 5                    | 3(1%)   | 3                          | 3(3%)   | 11               | 8(1%)    | 0.427   |
| Grade 2                                               | 12                     | 10(5%)  | 14                   | 12(6%)  | 7                          | 7(6%)   | 33               | 29(5%)   | 0.752   |
| <b>Overall adverse reactions within 0-28 days</b>     |                        |         |                      |         |                            |         |                  |          |         |
| <b>Any</b>                                            | 118                    | 56(26%) | 111                  | 63(29%) | 39                         | 27(24%) | 268              | 146(27%) | 0.550   |
| Grade 1                                               | 78                     | 40(18%) | 76                   | 52(24%) | 23                         | 18(16%) | 177              | 110(20%) | 0.155   |
| Grade 2                                               | 38                     | 22(10%) | 35                   | 24(11%) | 16                         | 15(13%) | 89               | 61(11%)  | 0.669   |
| Grade 3                                               | 2                      | 2(1%)   | 0                    | 0(0%)   | 0                          | 0(0%)   | 2                | 2(0%)    | 0.356   |

Abbreviation: alum, aluminum hydroxide

Note: n(%) represent the total number of participants who had adverse reactions (ie, adverse events related to vaccination).

\* For differences across all groups.

**Table 2-2 Adverse reactions reported within 28 days after the first dose of vaccine or alum only in phase 1 and phase 2**

|                                                    | 1.5ug group<br>(n=219) |         | 3ug group<br>(n=217) |         | Alum only group<br>(n=114) |         | Total<br>(n=550) |         | P value |
|----------------------------------------------------|------------------------|---------|----------------------|---------|----------------------------|---------|------------------|---------|---------|
|                                                    | No. of events          | n (%)   | No. of events        | n (%)   | No. of events              | n (%)   | No. of events    | n (%)   |         |
| <b>Solicited adverse reactions within 0-7 days</b> |                        |         |                      |         |                            |         |                  |         |         |
| <b>Any</b>                                         | 53                     | 31(14%) | 56                   | 42(19%) | 21                         | 15(13%) | 130              | 88(16%) | 0.226   |
| Grade 1                                            | 35                     | 23(11%) | 42                   | 35(16%) | 14                         | 9(8%)   | 91               | 67(12%) | 0.065   |
| Grade 2                                            | 17                     | 10(5%)  | 14                   | 13(6%)  | 7                          | 7(6%)   | 38               | 30(5%)  | 0.760   |
| Grade 3                                            | 1                      | 1(<1%)  | 0                    | 0(0%)   | 0                          | 0(0%)   | 1                | 1(<1%)  | 1.000   |
| <b>Injection site adverse reactions</b>            |                        |         |                      |         |                            |         |                  |         |         |
| Pain                                               | 19                     | 19(9%)  | 21                   | 21(10%) | 0                          | 0(0%)   | 40               | 40(7%)  | 0.0003  |
| Grade 1                                            | 18                     | 18(8%)  | 21                   | 21(10%) | 0                          | 0(0%)   | 39               | 39(7%)  | 0.0003  |
| Grade 2                                            | 1                      | 1(<1%)  | 0                    | 0(0%)   | 0                          | 0(0%)   | 1                | 1(<1%)  | 1.000   |
| Swelling                                           | 1                      | 1(<1%)  | 3                    | 3(1%)   | 1                          | 1(1%)   | 5                | 5(1%)   | 0.741   |
| Grade 1                                            | 0                      | 0(0%)   | 3                    | 3(1%)   | 0                          | 0(0%)   | 3                | 3(1%)   | 0.172   |
| Grade 2                                            | 1                      | 1(<1%)  | 0                    | 0(0%)   | 1                          | 1(1%)   | 2                | 2(<1%)  | 0.685   |
| Induration                                         | 0                      | 0(0%)   | 2                    | 2(1%)   | 0                          | 0(0%)   | 2                | 2(<1%)  | 0.198   |
| Grade 1                                            | 0                      | 0(0%)   | 2                    | 2(1%)   | 0                          | 0(0%)   | 2                | 2(<1%)  | 0.198   |
| Pruritus                                           | 3                      | 3(1%)   | 1                    | 1(<1%)  | 0                          | 0(0%)   | 4                | 4(1%)   | 0.540   |
| Grade 1                                            | 3                      | 3(1%)   | 1                    | 1(<1%)  | 0                          | 0(0%)   | 4                | 4(1%)   | 0.540   |
| <b>Systematic adverse reactions</b>                |                        |         |                      |         |                            |         |                  |         |         |
| Fever                                              | 6                      | 6(3%)   | 11                   | 10(5%)  | 4                          | 4(4%)   | 21               | 20(4%)  | 0.585   |
| Grade 1                                            | 1                      | 1(<1%)  | 2                    | 2(1%)   | 2                          | 2(2%)   | 5                | 5(1%)   | 0.363   |
| Grade 2                                            | 4                      | 4(2%)   | 9                    | 8(4%)   | 2                          | 2(2%)   | 15               | 14(3%)  | 0.441   |
| Grade 3                                            | 1                      | 1(<1%)  | 0                    | 0(0%)   | 0                          | 0(0%)   | 1                | 1(0%)   | 1.000   |
| Cough                                              | 4                      | 3(1%)   | 6                    | 6(3%)   | 4                          | 4(4%)   | 14               | 13(2%)  | 0.359   |
| Grade 1                                            | 2                      | 1(<1%)  | 3                    | 3(1%)   | 2                          | 2(2%)   | 7                | 6(1%)   | 0.516   |
| Grade 2                                            | 2                      | 2(1%)   | 3                    | 3(1%)   | 2                          | 2(2%)   | 7                | 7(1%)   | 0.797   |
| Headache                                           | 5                      | 4(2%)   | 2                    | 2(1%)   | 3                          | 3(3%)   | 10               | 9(2%)   | 0.464   |
| Grade 1                                            | 2                      | 2(1%)   | 2                    | 2(1%)   | 1                          | 1(1%)   | 5                | 5(1%)   | 1.000   |
| Grade 2                                            | 3                      | 3(1%)   | 0                    | 0(0%)   | 2                          | 2(2%)   | 5                | 5(1%)   | 0.158   |
| Anorexia                                           | 3                      | 2(1%)   | 2                    | 2(1%)   | 2                          | 2(2%)   | 7                | 6(1%)   | 0.755   |
| Grade 1                                            | 1                      | 1(<1%)  | 1                    | 1(<1%)  | 2                          | 2(2%)   | 4                | 4(1%)   | 0.343   |
| Grade 2                                            | 2                      | 2(1%)   | 1                    | 1(<1%)  | 0                          | 0(0%)   | 3                | 3(1%)   | 0.804   |
| Diarrhoea                                          | 1                      | 1(<1%)  | 2                    | 2(1%)   | 4                          | 3(3%)   | 7                | 6(1%)   | 0.182   |
| Grade 1                                            | 1                      | 1(<1%)  | 2                    | 2(1%)   | 4                          | 3(3%)   | 7                | 6(1%)   | 0.182   |
| Nausea                                             | 3                      | 2(1%)   | 2                    | 2(1%)   | 2                          | 2(2%)   | 7                | 6(1%)   | 0.755   |
| Grade 1                                            | 3                      | 2(1%)   | 2                    | 2(1%)   | 2                          | 2(2%)   | 7                | 6(1%)   | 0.755   |
| Mucocutaneous eruption                             | 1                      | 1(<1%)  | 2                    | 2(1%)   | 0                          | 0(0%)   | 3                | 3(1%)   | 0.616   |
| Grade 1                                            | 1                      | 1(<1%)  | 1                    | 1(<1%)  | 0                          | 0(0%)   | 2                | 2(<1%)  | 1.000   |
| Grade 2                                            | 0                      | 0(0%)   | 1                    | 1(<1%)  | 0                          | 0(0%)   | 1                | 1(<1%)  | 0.602   |
| Vomiting                                           | 1                      | 1(<1%)  | 1                    | 1(<1%)  | 0                          | 0(0%)   | 2                | 2(<1%)  | 1.000   |
| Grade 1                                            | 1                      | 1(<1%)  | 1                    | 1(<1%)  | 0                          | 0(0%)   | 2                | 2(<1%)  | 1.000   |
| Muscle pain                                        | 4                      | 3(1%)   | 0                    | 0(0%)   | 0                          | 0(0%)   | 4                | 3(1%)   | 0.234   |
| Grade 1                                            | 1                      | 1(<1%)  | 0                    | 0(0%)   | 0                          | 0(0%)   | 1                | 1(<1%)  | 1.000   |
| Grade 2                                            | 3                      | 2(1%)   | 0                    | 0(0%)   | 0                          | 0(0%)   | 3                | 2(<1%)  | 0.356   |
| Fatigue                                            | 2                      | 1(<1%)  | 1                    | 1(<1%)  | 1                          | 1(1%)   | 4                | 3(1%)   | 1.000   |
| Grade 1                                            | 1                      | 1(<1%)  | 1                    | 1(<1%)  | 1                          | 1(1%)   | 3                | 3(1%)   | 1.000   |

|                                                       |    |         |    |         |    |         |     |         |       |
|-------------------------------------------------------|----|---------|----|---------|----|---------|-----|---------|-------|
| Grade 2                                               | 1  | 1(<1%)  | 0  | 0(0%)   | 0  | 0(0%)   | 1   | 1(<1%)  | 1-000 |
| <b>Unsolicited adverse reactions within 0-28 days</b> |    |         |    |         |    |         |     |         |       |
| <b>Any</b>                                            | 7  | 6(3%)   | 17 | 13(6%)  | 7  | 7(6%)   | 31  | 26(5%)  | 0-190 |
| Grade 1                                               | 2  | 1(<1%)  | 5  | 3(1%)   | 1  | 1(1%)   | 8   | 5(1%)   | 0-741 |
| Grade 2                                               | 5  | 5(2%)   | 12 | 10(5%)  | 6  | 6(5%)   | 23  | 21(4%)  | 0-249 |
| <b>Overall adverse reactions within 0-28 days</b>     |    |         |    |         |    |         |     |         |       |
| <b>Any</b>                                            | 60 | 33(15%) | 73 | 46(21%) | 28 | 19(17%) | 161 | 98(18%) | 0-239 |
| Grade 1                                               | 37 | 23(11%) | 47 | 36(17%) | 15 | 10(9%)  | 99  | 69(13%) | 0-069 |
| Grade 2                                               | 22 | 13(6%)  | 26 | 18(8%)  | 13 | 12(11%) | 61  | 43(8%)  | 0-316 |
| Grade 3                                               | 1  | 1(<1%)  | 0  | 0(0)    | 0  | 0(0)    | 1   | 1(<1%)  | 1-000 |

Abbreviation: alum, aluminum hydroxide

Note: n(%) represent the total number of participants who had adverse reactions (ie, adverse events related to vaccination).

\* For differences across all groups.

**Table 2-3 Adverse reactions reported within 28 days after the second dose of vaccine or alum only in phase 1 and phase 2**

|                                                    | 1.5ug group<br>(n=214) |         | 3ug group<br>(n=211) |         | Alum only group<br>(n=111) |       | Total<br>(n=536) |         | P value |
|----------------------------------------------------|------------------------|---------|----------------------|---------|----------------------------|-------|------------------|---------|---------|
|                                                    | No. of events          | n (%)   | No. of events        | n (%)   | No. of events              | n (%) | No. of events    | n (%)   |         |
| <b>Solicited adverse reactions within 0-7 days</b> |                        |         |                      |         |                            |       |                  |         |         |
| <b>Any</b>                                         | 50                     | 31(14%) | 36                   | 25(12%) | 8                          | 8(7%) | 94               | 64(12%) | 0.153   |
| Grade 1                                            | 40                     | 27(13%) | 29                   | 22(10%) | 6                          | 6(5%) | 75               | 55(10%) | 0.115   |
| Grade 2                                            | 9                      | 7(3%)   | 7                    | 7(3%)   | 2                          | 2(2%) | 18               | 16(3%)  | 0.847   |
| Grade 3                                            | 1                      | 1(<1%)  | 0                    | 0(0%)   | 0                          | 0(0%) | 1                | 1(<1%)  | 1.000   |
| <b>Injection site adverse reactions</b>            |                        |         |                      |         |                            |       |                  |         |         |
| <b>Pain</b>                                        | 25                     | 25(12%) | 20                   | 20(9%)  | 2                          | 2(2%) | 47               | 47(9%)  | 0.0038  |
| Grade 1                                            | 23                     | 23(11%) | 20                   | 20(9%)  | 2                          | 2(2%) | 45               | 45(8%)  | 0.0078  |
| Grade 2                                            | 2                      | 2(1%)   | 0                    | 0(0%)   | 0                          | 0(0%) | 2                | 2(<1%)  | 0.356   |
| <b>Swelling</b>                                    | 2                      | 2(1%)   | 4                    | 4(2%)   | 0                          | 0(0%) | 6                | 6(1%)   | 0.272   |
| Grade 1                                            | 0                      | 0(0%)   | 1                    | 1(<1%)  | 0                          | 0(0%) | 1                | 1(<1%)  | 0.601   |
| Grade 2                                            | 2                      | 2(1%)   | 3                    | 3(1%)   | 0                          | 0(0%) | 5                | 5(1%)   | 0.541   |
| <b>Erythema</b>                                    | 0                      | 0(0%)   | 1                    | 1(<1%)  | 0                          | 0(0%) | 1                | 1(<1%)  | 0.601   |
| Grade 1                                            | 0                      | 0(0%)   | 1                    | 1(<1%)  | 0                          | 0(0%) | 1                | 1(<1%)  | 0.601   |
| <b>Pruritus</b>                                    | 1                      | 1(<1%)  | 1                    | 1(<1%)  | 0                          | 0(0%) | 2                | 2(<1%)  | 1.000   |
| Grade 1                                            | 1                      | 1(<1%)  | 1                    | 1(<1%)  | 0                          | 0(0%) | 2                | 2(<1%)  | 1.000   |
| <b>Systematic adverse reactions</b>                |                        |         |                      |         |                            |       |                  |         |         |
| <b>Fever</b>                                       | 3                      | 3(1%)   | 2                    | 2(1%)   | 1                          | 1(1%) | 6                | 6(1%)   | 1.000   |
| Grade 1                                            | 2                      | 2(1%)   | 0                    | 0(0%)   | 0                          | 0(0%) | 2                | 2(<1%)  | 0.356   |
| Grade 2                                            | 0                      | 0(0%)   | 2                    | 2(1%)   | 1                          | 1(1%) | 3                | 3(1%)   | 0.330   |
| Grade 3                                            | 1                      | 1(<1%)  | 0                    | 0(<1%)  | 0                          | 0(0%) | 1                | 1(<1%)  | 1.000   |
| <b>Cough</b>                                       | 4                      | 3(1%)   | 2                    | 2(1%)   | 1                          | 1(1%) | 7                | 6(1%)   | 1.000   |
| Grade 1                                            | 2                      | 1(<1%)  | 1                    | 1(<1%)  | 1                          | 1(1%) | 4                | 3(1%)   | 1.000   |
| Grade 2                                            | 2                      | 2(1%)   | 1                    | 1(<1%)  | 0                          | 0(0%) | 3                | 3(1%)   | 0.804   |
| <b>Headache</b>                                    | 4                      | 3(1%)   | 3                    | 2(1%)   | 0                          | 0(0%) | 7                | 5(1%)   | 0.640   |
| Grade 1                                            | 3                      | 2(1%)   | 2                    | 1(<1%)  | 0                          | 0(0%) | 5                | 3(1%)   | 0.804   |
| Grade 2                                            | 1                      | 1(<1%)  | 1                    | 1(<1%)  | 0                          | 0(0%) | 2                | 2(<1%)  | 1.000   |
| <b>Anorexia</b>                                    | 2                      | 2(1%)   | 2                    | 2(1%)   | 0                          | 0(0%) | 4                | 4(1%)   | 0.688   |
| Grade 1                                            | 1                      | 1(<1%)  | 2                    | 2(1%)   | 0                          | 0(0%) | 3                | 3(1%)   | 0.615   |
| Grade 2                                            | 1                      | 1(<1%)  | 0                    | 0(0%)   | 0                          | 0(0%) | 1                | 1(<1%)  | 1.000   |
| <b>Diarrhoea</b>                                   | 1                      | 1(<1%)  | 0                    | 0(0%)   | 1                          | 1(1%) | 2                | 2(<1%)  | 0.685   |
| Grade 1                                            | 1                      | 1(<1%)  | 0                    | 0(0%)   | 1                          | 1(1%) | 2                | 2(<1%)  | 0.685   |
| <b>Nausea</b>                                      | 2                      | 2(1%)   | 1                    | 1(<1%)  | 0                          | 0(0%) | 3                | 3(1%)   | 0.804   |
| Grade 1                                            | 2                      | 2(1%)   | 1                    | 1(<1%)  | 0                          | 0(0%) | 3                | 3(1%)   | 0.804   |
| <b>Mucocutaneous eruption</b>                      | 1                      | 1(<1%)  | 0                    | 0(0%)   | 1                          | 1(1%) | 2                | 2(<1%)  | 0.685   |
| Grade 2                                            | 1                      | 1(<1%)  | 0                    | 0(0%)   | 1                          | 1(1%) | 2                | 2(<1%)  | 0.685   |
| <b>Vomiting</b>                                    | 2                      | 2(1%)   | 0                    | 0(0%)   | 1                          | 1(1%) | 3                | 3(1%)   | 0.429   |
| Grade 1                                            | 2                      | 2(1%)   | 0                    | 0(0%)   | 1                          | 1(1%) | 3                | 3(1%)   | 0.429   |
| <b>Muscle pain</b>                                 | 1                      | 1(<1%)  | 0                    | 0(0%)   | 0                          | 0(0%) | 1                | 1(<1%)  | 1.000   |
| Grade 1                                            | 1                      | 1(<1%)  | 0                    | 0(0%)   | 0                          | 0(0%) | 1                | 1(<1%)  | 1.000   |
| <b>Fatigue</b>                                     | 2                      | 1(<1%)  | 0                    | 0(0%)   | 0                          | 0(0%) | 2                | 1(<1%)  | 1.000   |
| Grade 1                                            | 2                      | 1(<1%)  | 0                    | 0(0%)   | 0                          | 0(0%) | 2                | 1(<1%)  | 1.000   |
| <b>Hypersensitivity</b>                            | 0                      | 0(0%)   | 0                    | 0(0%)   | 1                          | 1(1%) | 1                | 1(<1%)  | 0.207   |

|                                                       |    |         |    |         |    |         |     |         |       |
|-------------------------------------------------------|----|---------|----|---------|----|---------|-----|---------|-------|
| Grade 1                                               | 0  | 0(0%)   | 0  | 0(0%)   | 1  | 1(1%)   | 1   | 1(<1%)  | 0.207 |
| <b>Unsolicited adverse reactions within 0-28 days</b> |    |         |    |         |    |         |     |         |       |
| <b>Any</b>                                            | 8  | 6(3%)   | 2  | 2(1%)   | 3  | 3(3%)   | 13  | 11(2%)  | 0.351 |
| Grade 1                                               | 1  | 1(<1%)  | 0  | 0(0%)   | 2  | 2(2%)   | 3   | 3(1%)   | 0.110 |
| Grade 2                                               | 7  | 5(2%)   | 2  | 2(1%)   | 1  | 1(1%)   | 10  | 8(1%)   | 0.584 |
| <b>Overall adverse reactions within 0-28 days</b>     |    |         |    |         |    |         |     |         |       |
| <b>Any</b>                                            | 58 | 35(16%) | 38 | 26(12%) | 11 | 11(10%) | 107 | 72(13%) | 0.240 |
| Grade 1                                               | 41 | 28(13%) | 29 | 22(10%) | 8  | 8(7%)   | 78  | 58(11%) | 0.283 |
| Grade 2                                               | 16 | 10(5%)  | 9  | 9(4%)   | 3  | 3(3%)   | 28  | 22(4%)  | 0.784 |
| Grade 3                                               | 1  | 1(<1%)  | 0  | 0(0)    | 0  | 0(0)    | 1   | 1(<1%)  | 1.000 |

Abbreviation: alum, aluminum hydroxide

Note: n(%) represent the total number of participants who had adverse reactions (ie, adverse events related to vaccination).

\* For differences across all groups.



**Table 2-4 Adverse reactions reported within 28 days after first and second doses of vaccine or alum only in different age groups in phase 1 and phase 2**

|                                                    | 3-5 years          |                  |                        |         | 6-11 years         |                  |                        |         | 12-17 years        |                  |                        |         |
|----------------------------------------------------|--------------------|------------------|------------------------|---------|--------------------|------------------|------------------------|---------|--------------------|------------------|------------------------|---------|
|                                                    | 1.5ug group (n=57) | 3ug group (n=56) | Alum only group (n=30) | P value | 1.5ug group (n=81) | 3ug group (n=81) | Alum only group (n=42) | P value | 1.5ug group (n=81) | 3ug group (n=80) | Alum only group (n=42) | P value |
| <b>Solicited adverse reactions within 0-7 days</b> |                    |                  |                        |         |                    |                  |                        |         |                    |                  |                        |         |
| Any                                                | 12(21%)            | 14(25%)          | 7(23%)                 | 0.874   | 11(14%)            | 15(19%)          | 6(14%)                 | 0.680   | 28(35%)            | 30(38%)          | 9(21%)                 | 0.186   |
| Grade 1                                            | 7(12%)             | 8(14%)           | 3(10%)                 | 0.899   | 7(9%)              | 13(16%)          | 5(12%)                 | 0.343   | 25(31%)            | 30(38%)          | 7(17%)                 | 0.056   |
| Grade 2                                            | 4(7%)              | 9(16%)           | 5(17%)                 | 0.251   | 4(5%)              | 6(7%)            | 2(5%)                  | 0.802   | 8(10%)             | 4(5%)            | 2(5%)                  | 0.485   |
| Grade 3                                            | 1(2%)              | 0(0%)            | 0(0%)                  | 1.000   | 1(1%)              | 0(0%)            | 0(0%)                  | 1.000   | 0(0%)              | 0(0%)            | 0(0%)                  | 1.000   |
| <b>Injection site adverse reactions</b>            |                    |                  |                        |         |                    |                  |                        |         |                    |                  |                        |         |
| Pain                                               | 6(11%)             | 4(7%)            | 0(0%)                  | 0.203   | 5(6%)              | 10(12%)          | 1(2%)                  | 0.136   | 25(31%)            | 21(26%)          | 1(2%)                  | 0.0003  |
| Grade 1                                            | 6(11%)             | 4(7%)            | 0(0%)                  | 0.203   | 5(6%)              | 10(12%)          | 1(2%)                  | 0.136   | 23(28%)            | 21(26%)          | 1(2%)                  | 0.0005  |
| Grade 2                                            | 0(0%)              | 0(0%)            | 0(0%)                  | 1.000   | 0(0%)              | 0(0%)            | 0(0%)                  | 1.000   | 2(2%)              | 0(0%)            | 0(0%)                  | 0.354   |
| Swelling                                           | 0(0%)              | 2(4%)            | 0(0%)                  | 0.195   | 0(0%)              | 1(1%)            | 0(0%)                  | 1.000   | 3(4%)              | 3(4%)            | 1(2%)                  | 1.000   |
| Grade 1                                            | 0(0%)              | 2(4%)            | 0(0%)                  | 0.195   | 0(0%)              | 0(0%)            | 0(0%)                  | 1.000   | 0(0%)              | 2(3%)            | 0(0%)                  | 0.196   |
| Grade 2                                            | 0(0%)              | 0(0%)            | 0(0%)                  | 1.000   | 0(0%)              | 1(1%)            | 0(0%)                  | 1.000   | 3(4%)              | 2(3%)            | 1(2%)                  | 1.000   |
| Induration                                         | 0(0%)              | 0(0%)            | 0(0%)                  | 1.000   | 0(0%)              | 0(0%)            | 0(0%)                  | 1.000   | 0(0%)              | 2(3%)            | 0(0%)                  | 0.196   |
| Grade 1                                            | 0(0%)              | 0(0%)            | 0(0%)                  | 1.000   | 0(0%)              | 0(0%)            | 0(0%)                  | 1.000   | 0(0%)              | 2(3%)            | 0(0%)                  | 0.196   |
| Erythema                                           | 0(0%)              | 0(0%)            | 0(0%)                  | 1.000   | 0(0%)              | 0(0%)            | 0(0%)                  | 1.000   | 0(0%)              | 1(1%)            | 0(0%)                  | 0.601   |
| Grade 1                                            | 0(0%)              | 0(0%)            | 0(0%)                  | 1.000   | 0(0%)              | 0(0%)            | 0(0%)                  | 1.000   | 0(0%)              | 1(1%)            | 0(0%)                  | 0.601   |
| Pruritus                                           | 0(0%)              | 1(2%)            | 0(0%)                  | 0.601   | 1(1%)              | 0(0%)            | 0(0%)                  | 1.000   | 2(2%)              | 1(1%)            | 0(0%)                  | 0.802   |
| Grade 1                                            | 0(0%)              | 1(2%)            | 0(0%)                  | 0.601   | 1(1%)              | 0(0%)            | 0(0%)                  | 1.000   | 2(2%)              | 1(1%)            | 0(0%)                  | 0.802   |
| <b>Systematic adverse reactions</b>                |                    |                  |                        |         |                    |                  |                        |         |                    |                  |                        |         |
| Fever                                              | 5(9%)              | 5(9%)            | 3(10%)                 | 1.000   | 3(4%)              | 4(5%)            | 2(5%)                  | 1.000   | 1(1%)              | 2(3%)            | 0(0%)                  | 0.613   |
| Grade 1                                            | 1(2%)              | 0(0%)            | 1(3%)                  | 0.686   | 1(1%)              | 1(1%)            | 1(2%)                  | 1.000   | 1(1%)              | 1(1%)            | 0(0%)                  | 1.000   |

|                        | 3-5 years          |                  |                        |         | 6-11 years         |                  |                        |         | 12-17 years        |                  |                        |         |
|------------------------|--------------------|------------------|------------------------|---------|--------------------|------------------|------------------------|---------|--------------------|------------------|------------------------|---------|
|                        | 1.5ug group (n=57) | 3ug group (n=56) | Alum only group (n=30) | P value | 1.5ug group (n=81) | 3ug group (n=81) | Alum only group (n=42) | P value | 1.5ug group (n=81) | 3ug group (n=80) | Alum only group (n=42) | P value |
| Grade 2                | 3(5%)              | 5(9%)            | 2(7%)                  | 0.841   | 1(1%)              | 4(5%)            | 1(2%)                  | 0.447   | 0(0%)              | 1(1%)            | 0(0%)                  | 0.601   |
| Grade 3                | 1(2%)              | 0(0%)            | 0(0%)                  | 1.000   | 1(1%)              | 0(0%)            | 0(0%)                  | 1.000   | 0(0%)              | 0(0%)            | 0(0%)                  | 1.000   |
| Cough                  | 1(2%)              | 3(5%)            | 2(7%)                  | 0.506   | 2(2%)              | 2(2%)            | 2(5%)                  | 0.750   | 2(2%)              | 3(4%)            | 1(2%)                  | 0.875   |
| Grade 1                | 0(0%)              | 0(0%)            | 1(3%)                  | 0.210   | 0(0%)              | 1(1%)            | 1(2%)                  | 0.683   | 1(1%)              | 3(4%)            | 1(2%)                  | 0.738   |
| Grade 2                | 1(2%)              | 3(5%)            | 1(3%)                  | 0.735   | 2(2%)              | 1(1%)            | 1(2%)                  | 1.000   | 1(1%)              | 0(0%)            | 0(0%)                  | 1.000   |
| Headache               | 0(0%)              | 0(0%)            | 1(3%)                  | 0.210   | 2(2%)              | 0(0%)            | 0(0%)                  | 0.355   | 4(5%)              | 4(5%)            | 2(5%)                  | 1.000   |
| Grade 1                | 0(0%)              | 0(0%)            | 0(0%)                  | 1.000   | 1(1%)              | 0(0%)            | 0(0%)                  | 1.000   | 2(2%)              | 3(4%)            | 1(2%)                  | 0.875   |
| Grade 2                | 0(0%)              | 0(0%)            | 1(3%)                  | 0.210   | 1(1%)              | 0(0%)            | 0(0%)                  | 1.000   | 3(4%)              | 1(1%)            | 1(2%)                  | 0.843   |
| Anorexia               | 0(0%)              | 1(2%)            | 1(3%)                  | 0.517   | 1(1%)              | 0(0%)            | 0(0%)                  | 1.000   | 2(2%)              | 3(4%)            | 1(2%)                  | 0.875   |
| Grade 1                | 0(0%)              | 0(0%)            | 1(3%)                  | 0.210   | 0(0%)              | 0(0%)            | 0(0%)                  | 1.000   | 1(1%)              | 3(4%)            | 1(2%)                  | 0.738   |
| Grade 2                | 0(0%)              | 1(2%)            | 0(0%)                  | 0.601   | 1(1%)              | 0(0%)            | 0(0%)                  | 1.000   | 2(2%)              | 0(0%)            | 0(0%)                  | 0.354   |
| Diarrhoea              | 0(0%)              | 1(2%)            | 2(7%)                  | 0.060   | 0(0%)              | 1(1%)            | 1(2%)                  | 0.683   | 2(2%)              | 0(0%)            | 1(2%)                  | 0.427   |
| Grade 1                | 0(0%)              | 1(2%)            | 2(7%)                  | 0.060   | 0(0%)              | 1(1%)            | 1(2%)                  | 0.683   | 2(2%)              | 0(0%)            | 1(2%)                  | 0.427   |
| Nausea                 | 1(2%)              | 1(2%)            | 1(3%)                  | 1.000   | 0(0%)              | 0(0%)            | 0(0%)                  | 1.000   | 2(2%)              | 1(1%)            | 1(2%)                  | 1.000   |
| Grade 1                | 1(2%)              | 1(2%)            | 1(3%)                  | 1.000   | 0(0%)              | 0(0%)            | 0(0%)                  | 1.000   | 2(2%)              | 1(1%)            | 1(2%)                  | 1.000   |
| Mucocutaneous eruption | 0(0%)              | 0(0%)            | 1(3%)                  | 0.210   | 2(2%)              | 0(0%)            | 0(0%)                  | 0.355   | 0(0%)              | 2(3%)            | 0(0%)                  | 0.196   |
| Grade 1                | 0(0%)              | 0(0%)            | 0(0%)                  | 1.000   | 1(1%)              | 0(0%)            | 0(0%)                  | 1.000   | 0(0%)              | 1(1%)            | 0(0%)                  | 0.601   |
| Grade 2                | 0(0%)              | 0(0%)            | 1(3%)                  | 0.210   | 1(1%)              | 0(0%)            | 0(0%)                  | 1.000   | 0(0%)              | 1(1%)            | 0(0%)                  | 0.601   |
| Vomiting               | 1(2%)              | 1(2%)            | 0(0%)                  | 1.000   | 0(0%)              | 0(0%)            | 1(2%)                  | 0.206   | 2(2%)              | 0(0%)            | 0(0%)                  | 0.354   |
| Grade 1                | 1(2%)              | 1(2%)            | 0(0%)                  | 1.000   | 0(0%)              | 0(0%)            | 1(2%)                  | 0.206   | 2(2%)              | 0(0%)            | 0(0%)                  | 0.354   |
| Muscle pain            | 0(0%)              | 0(0%)            | 0(0%)                  | 1.000   | 0(0%)              | 0(0%)            | 0(0%)                  | 1.000   | 4(5%)              | 0(0%)            | 0(0%)                  | 0.076   |

|                                                       | 3-5 years          |                  |                        |         | 6-11 years         |                  |                        |         | 12-17 years        |                  |                        |         |
|-------------------------------------------------------|--------------------|------------------|------------------------|---------|--------------------|------------------|------------------------|---------|--------------------|------------------|------------------------|---------|
|                                                       | 1.5ug group (n=57) | 3ug group (n=56) | Alum only group (n=30) | P value | 1.5ug group (n=81) | 3ug group (n=81) | Alum only group (n=42) | P value | 1.5ug group (n=81) | 3ug group (n=80) | Alum only group (n=42) | P value |
| Grade 1                                               | 0(0%)              | 0(0%)            | 0(0%)                  | 1.000   | 0(0%)              | 0(0%)            | 0(0%)                  | 1.000   | 2(2%)              | 0(0%)            | 0(0%)                  | 0.354   |
| Grade 2                                               | 0(0%)              | 0(0%)            | 0(0%)                  | 1.000   | 0(0%)              | 0(0%)            | 0(0%)                  | 1.000   | 2(2%)              | 0(0%)            | 0(0%)                  | 0.354   |
| Fatigue                                               | 0(0%)              | 0(0%)            | 0(0%)                  | 1.000   | 0(0%)              | 0(0%)            | 1(2%)                  | 0.206   | 1(1%)              | 1(1%)            | 0(0%)                  | 1.000   |
| Grade 1                                               | 0(0%)              | 0(0%)            | 0(0%)                  | 1.000   | 0(0%)              | 0(0%)            | 1(2%)                  | 0.206   | 1(1%)              | 1(1%)            | 0(0%)                  | 1.000   |
| Grade 2                                               | 0(0%)              | 0(0%)            | 0(0%)                  | 1.000   | 0(0%)              | 0(0%)            | 1(2%)                  | 0.206   | 1(1%)              | 0(0%)            | 0(0%)                  | 1.000   |
| Hypersensitivity                                      | 0(0%)              | 0(0%)            | 0(0%)                  | 1.000   | 0(0%)              | 0(0%)            | 0(0%)                  | 1.000   | 0(0%)              | 0(0%)            | 1(2%)                  | 0.207   |
| Grade 1                                               | 0(0%)              | 0(0%)            | 0(0%)                  | 1.000   | 0(0%)              | 0(0%)            | 0(0%)                  | 1.000   | 0(0%)              | 0(0%)            | 1(2%)                  | 0.207   |
| <b>Unsolicited adverse reactions within 0-28 days</b> |                    |                  |                        |         |                    |                  |                        |         |                    |                  |                        |         |
| Any                                                   | 2(4%)              | 6(11%)           | 3(10%)                 | 0.306   | 2(2%)              | 5(6%)            | 3(7%)                  | 0.443   | 7(9%)              | 4(5%)            | 3(7%)                  | 0.677   |
| Grade 1                                               | 0(0%)              | 1(2%)            | 1(3%)                  | 0.517   | 0(0%)              | 1(1%)            | 1(2%)                  | 0.683   | 2(2%)              | 1(1%)            | 1(2%)                  | 1.000   |
| Grade 2                                               | 2(4%)              | 5(9%)            | 3(10%)                 | 0.403   | 2(2%)              | 4(5%)            | 2(5%)                  | 0.719   | 6(7%)              | 3(4%)            | 2(5%)                  | 0.623   |
| <b>Overall adverse reactions within 0-28 days</b>     |                    |                  |                        |         |                    |                  |                        |         |                    |                  |                        |         |
| Any                                                   | 13(23%)            | 15(27%)          | 9(30%)                 | 0.754   | 12(15%)            | 18(22%)          | 7(17%)                 | 0.461   | 31(38%)            | 30(38%)          | 11(26%)                | 0.383   |
| Grade 1                                               | 7(12%)             | 8(14%)           | 4(13%)                 | 0.950   | 7(9%)              | 14(17%)          | 6(14%)                 | 0.269   | 26(32%)            | 30(38%)          | 8(19%)                 | 0.110   |
| Grade 2                                               | 5(9%)              | 10(18%)          | 7(23%)                 | 0.145   | 6(7%)              | 9(11%)           | 4(10%)                 | 0.743   | 11(14%)            | 5(6%)            | 4(10%)                 | 0.300   |
| Grade 3                                               | 1(2%)              | 0(0%)            | 0(0%)                  | 1.000   | 1(1%)              | 0(0%)            | 0(0%)                  | 1.000   | 0(0%)              | 0(0%)            | 0(0%)                  | 1.000   |

Abbreviation: alum, aluminum hydroxide

Note: Data are n(%), representing the total number of participants who had adverse reactions (ie, adverse events related to vaccination).

**Appendix 3 Clinically significant laboratory abnormalities**

**Table 3-1 Clinically significant laboratory abnormalities at day 3 after the first dose and second dose**

| <b>Dose</b>        | <b>Laboratory index</b>  | <b>1.5ug group</b> | <b>3ug group</b> | <b>Alum only group</b> | <b>Total</b> |
|--------------------|--------------------------|--------------------|------------------|------------------------|--------------|
| <b>First dose</b>  | <b>N</b>                 | <b>27</b>          | <b>26</b>        | <b>18</b>              | <b>71</b>    |
|                    | <b>White blood cells</b> |                    |                  |                        |              |
|                    | Grade 1                  | 0(0)               | 2(8%)            | 0(0)                   | 2(3%)        |
| <b>Second dose</b> | <b>N</b>                 | <b>27</b>          | <b>26</b>        | <b>16</b>              | <b>69</b>    |
|                    | <b>White blood cells</b> |                    |                  |                        |              |
|                    | Grade 1                  | 1(4%)              | 0(0)             | 0(0)                   | 1(1%)        |
|                    | <b>Hemoglobin</b>        |                    |                  |                        |              |
|                    | Grade 1                  | 0(0)               | 1(4%)            | 0(0)                   | 1(1%)        |

Abbreviation: alum, aluminum hydroxide

Note: Data are n(%), representing the total number of participants who had clinically significant laboratory abnormalities.

#### Appendix 4 Immunogenicity results

**Table 4-1 Immunogenicity results of neutralising antibody to live SARS-CoV-2 induced by CoronaVac in phase 1**

| Time                            | Characteristics                 | 1.5ug group<br>(N=27)      | 3ug group<br>(N=26)        | Alum only<br>group<br>(N=16) | <i>P</i> value_<br>three group | <i>P</i> value_<br>1.5ug vs 3ug | Difference/ Ratio *<br>95% CI |
|---------------------------------|---------------------------------|----------------------------|----------------------------|------------------------------|--------------------------------|---------------------------------|-------------------------------|
| <b>Before<br/>vaccination</b>   | Seropositive n(%)<br>(95% CI)   | 0 (0.0)<br>(0.0-12.8)      | 0 (0.0)<br>(0.0-13.2)      | 0 (0.0)<br>(0.0-20.6)        | 1.000                          | 1.000                           | 0.0<br>(-12.7-13.1)           |
|                                 | GMT<br>(95% CI)                 | 2.0<br>(2.0-2.0)           | 2.0<br>(2.0-2.0)           | 2.0<br>(2.0-2.0)             | NA                             | NA                              | 1.0<br>(1.0-1.0)              |
| <b>28 days after<br/>Dose 1</b> | Seropositive n(%)<br>(95% CI)   | 16 (59.3)<br>(38.8-77.6)   | 21 (80.8)<br>(60.7-93.5)   | 0 (0.0)<br>(0.0-20.6)        | <0.0001                        | 0.088                           | -21.5<br>(-45.5-2.4)          |
|                                 | Seroconversion n(%)<br>(95% CI) | 16 (59.3)<br>(38.8-77.6)   | 21 (80.8)<br>(60.7-93.5)   | 0 (0.0)<br>(0.0-20.6)        | <0.0001                        | 0.088                           | -21.5<br>(-45.5-2.4)          |
|                                 | GMT<br>(95% CI)                 | 8.0<br>(5.6-11.4)          | 14.1<br>(10.4-19.0)        | 2.0<br>(2.0-2.0)             | <0.0001                        | 0.015                           | 0.6<br>(0.4-0.9)              |
|                                 | GMI<br>(95% CI)                 | 4.0<br>(2.8-5.7)           | 7.0<br>(5.2-9.5)           | 1.0<br>(1.0-1.0)             | <0.0001                        | 0.015                           | 0.6<br>(0.4-0.9)              |
|                                 | Seropositive n(%)<br>(95% CI)   | 27 (100.0)<br>(87.2-100.0) | 26 (100.0)<br>(86.8-100.0) | 0 (0.0)<br>(0.0-20.6)        | <0.0001                        | 1.000                           | 0.0<br>(-12.7-13.1)           |
|                                 | Seroconversion n(%)<br>(95% CI) | 27 (100.0)<br>(87.2-100.0) | 26 (100.0)<br>(86.8-100.0) | 0 (0.0)<br>(0.0-20.6)        | <0.0001                        | 1.000                           | 0.0<br>(-12.7-13.1)           |
| <b>28 days after<br/>Dose 2</b> | GMT<br>(95% CI)                 | 55.0<br>(38.9-77.9)        | 117.4<br>(87.8-157.0)      | 2.0<br>(2.0-2.0)             | <0.0001                        | 0.0012                          | 0.5<br>(0.3-0.7)              |
|                                 | GMI<br>(95% CI)                 | 27.5<br>(19.4-39.0)        | 58.7<br>(43.9-78.5)        | 1.0<br>(1.0-1.0)             | <0.0001                        | 0.0012                          | 0.5<br>(0.3-0.7)              |
|                                 |                                 |                            |                            |                              |                                |                                 |                               |

Abbreviation: alum, aluminum hydroxide

\* The differences refer to the differences of seroconversion rate or seropositive rate (1.5ug group - 3ug group); The ratios refer to the ratios of GMT or GMI (1.5ug group/3ug group).

**Table 4-2 Immunogenicity results of neutralising antibody to live SARS-CoV-2 induced by CoronaVac in phase 2**

| Time                          | Characteristics                 | 1.5ug group<br>(N=186)         | 3ug group<br>(N=180)      | Alum only<br>group<br>(N=94) | P value_<br>three group | P value_<br>1.5ug vs 3ug | Difference/ Ratio *<br>95%CI |                       |
|-------------------------------|---------------------------------|--------------------------------|---------------------------|------------------------------|-------------------------|--------------------------|------------------------------|-----------------------|
| <b>Before<br/>vaccination</b> | Seropositive n(%)<br>(95%CI)    | 0 (0.0)<br>(0.0-2.0)           | 0 (0.0)<br>(0.0-2.0)      | 0 (0.0)<br>(0.0-3.9)         | 1.000                   | 1.000                    | 0.0<br>(-2.0-2.1)            |                       |
|                               | GMT<br>(95%CI)                  | 2.0<br>(2.0-2.0)               | 2.0<br>(2.0-2.0)          | 2.0<br>(2.0-2.0)             | NA                      | NA                       | 1.0<br>(1.0-1.0)             |                       |
|                               | <b>28 days after<br/>Dose 2</b> | Seropositive n(%)<br>(95%CI)   | 180 (96.8)<br>(93.1-98.8) | 180 (100.0)<br>(98.0-100.0)  | 0 (0.0)<br>(0.0-3.9)    | <0.0001                  | 0.030                        | -3.2<br>(-5.8 - -0.7) |
|                               |                                 | Seroconversion n(%)<br>(95%CI) | 180 (96.8)<br>(93.1-98.8) | 180 (100.0)<br>(98.0-100.0)  | 0 (0.0)<br>(0.0-3.9)    | <0.0001                  | 0.030                        | -3.2<br>(-5.8 - -0.7) |
|                               | GMT<br>(95%CI)                  | 86.4<br>(73.9-101.0)           | 142.2<br>(124.7-162.1)    | 2.0<br>(2.0-2.1)             | <0.0001                 | <0.0001                  | 0.6<br>(0.5-0.7)             |                       |
|                               | GMI<br>(95%CI)                  | 43.2<br>(36.9-50.5)            | 71.1<br>(62.4-81.1)       | 1.0<br>(1.0-1.0)             | <0.0001                 | <0.0001                  | 0.6<br>(0.5-0.7)             |                       |

Abbreviation: alum, aluminum hydroxide

\* The differences refer to the differences of seroconversion rate or seropositive rate (1.5ug group - 3ug group); The ratios refer to the ratios of GMT or GMI (1.5ug group/3ug group).

**Table 4-3 Comparisons of seroconversion rates and GMTs of neutralising antibodies to live SARS-CoV-2 in different age groups at day 28 after the second dose**

| Doses       | Characteristics      | Phase 1       |               |              |               | Phase 2       |               |               |         |
|-------------|----------------------|---------------|---------------|--------------|---------------|---------------|---------------|---------------|---------|
|             |                      | 3-5 years     | 6-11 years    | 12-17 years  | P value       | 3-5 years     | 6-11 years    | 12-17 years   | P value |
| 1.5ug group | Seroconversion n (%) | 9(100.0)      | 9(100.0)      | 9(100.0)     | 1.000         | 46 (100.0)    | 68 (98.6)     | 66 (93.0)     | 0.140   |
|             | (95%CI)              | (66.4-100.0)  | (66.4-100.00) | (66.4-100.0) |               | (92.3-100.0)  | (92.2-99.96)  | (84.3-97.7)   |         |
|             | GMT                  | 71.9          | 50.5          | 45.9         | 0.540         | 94.1          | 90.3          | 78.3          | 0.612   |
|             | (95%CI)              | (38.0-136.0)  | (30.9-82.6)   | (19.2-109.8) |               | (71.2, 124.2) | (72.6-112.2)  | (57.5-106.6)  |         |
| 3ug group   | Seroconversion n (%) | 9(100.0)      | 9(100.0)      | 8(100.0)     | 1.000         | 45 (100.0)    | 68 (100.0)    | 67 (100.0)    | 1.000   |
|             | (95%CI)              | (66.4-100.0)  | (66.4-100.0)  | (63.1-100.0) |               | (92.1-100.0)  | (94.7-100.0)  | (94.6-100.0)  |         |
|             | GMT                  | 212.6         | 101.6         | 70.8         | <b>0.0020</b> | 140.5         | 139.7         | 146.0         | 0.954   |
|             | (95%CI)              | (132.2-342.1) | (64.0-161.2)  | (47.5-105.7) |               | (113.4-174.0) | (112.7-173.1) | (114.2-186.8) |         |

#### **Appendix 5 Serious adverse events**

As of June 12, 2021, only one serious adverse event has been reported, which was considered unrelated to vaccination. The case narrative of this serious adverse events as follows:

A 5-year-old boy received the first dose of investigational vaccine on Nov 23, 2020 and received the second dose on Dec 21, 2020. On Dec 30 2020, he had cough, expectoration and fever of 37.5°C, and the symptoms did not improve after oral drug treatment. The subject was then hospitalized on Jan 2, 2021. During hospitalization, he had blood tests and chest X-ray test: WBC.10.46<sup>10<sup>9</sup>/L</sup>, NEUT%61.70%, LYMPH%27.40%, RBC5.06<sup>10<sup>12</sup>/L</sup>, PLT310.00<sup>10<sup>9</sup>/L</sup>, CRP<5mg/L, hs-CRP 1.30mg/L, and X-ray indicated pneumonia in right lower lobe. After admission, he was given anti-infection (Cefotaxime), and cough and phlegm treatment (Ambroxol injection). He recovered and discharged on Jan 11, 2021.

Causality: According to the subject's symptoms and related examinations, the serious adverse event was clearly diagnosed as "pneumonia". It was effective after symptomatic treatment. In addition, the inactivated vaccine did not cause infectious diseases. Therefore, this serious adverse event was considered possibly unrelated to vaccination.
